# Supplementary material
Source: MDPI journal article supplement (https://www.mdpi.com/2073-4468/2/1/50)
Supplement: s1 [file s1]

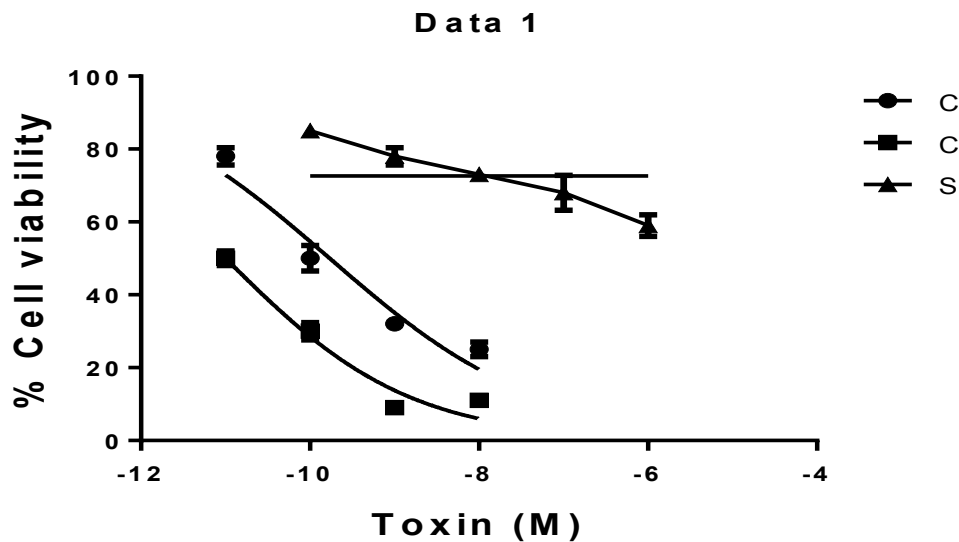

### Comparison of Fits

Null hypothesis

Alternative hypothesis

P value

Conclusion (alpha = 0.05)

Preferred model

### UNPAIRED T TEST

Table Analyzed

Data 1

Column B

vs.

Column A

CD7Sap + Chlo

vs.

CD7Sap

Unpaired t test

P value

0,2121

P value summary

ns

Significantly different? (P < 0.05)

No

One- or two-tailed P value?

Two-tailed

t, df

t=1,396 df=6

How big is the difference?

Mean ± SEM of column A

46,25 ± 11,82 N=4

Mean ± SEM of column B

25,00 ± 9,583 N=4

Difference between means

-21,25 ± 15,22

95% confidence interval

-58,49 to 15,99

R square

0,2453

F test to compare variances

F,DFn, Dfd

1,522, 3, 3

P value

0,7385

P value summary

ns

Significantly different? (P < 0.05)

No

D7Sap  
D7Sap + Chlo  
ap

Can't calculate  
One curve for all data sets  
Different curve for each data set

Other fit didn't work  
One curve for all data sets

Data 1

Sap  
vs,  
CD7Sap

0,0498

\*

Yes

Two-tailed  
t=2,286 df=7

46,25 ± 11,82 N=4  
72,60 ± 4,411 N=5  
26,35 ± 11,52  
-0,9012 to 53,60

0,4275

5,744, 3, 4

0,1244

ns

No

Data 1

Sap  
vs,  
CD7Sap + Chlo

0,0018

\*\*

Yes

Two-tailed  
t=4,862 df=7

25,00 ± 9,583 N=4  
72,60 ± 4,411 N=5  
47,60 ± 9,791  
24,45 to 70,75

0,7715

3,775, 3, 4

0,232

ns

No
